# Supplementary material
Source: publisher figshare collection journal article supplement (https://plos.figshare.com/articles/dataset/_/5190568)
Supplement: Supplementary file 1 [file 1 › S1 Data Set.xlsx]

## Sheet: Sheet1
id	age	arv0	cd4rslt	pcpproph	death2mo	los	igm_a	igm_b	igm_c1	igm_c3	igm_c8	igm_c9	igg_a	igg_b	igg_c1	igg_c3	igg_c8	igg_c9	smoke	male	mbaa	mbac1	mbac8	mbma	mbmb	mbmc1	mbmc3	mbmc8	mbmc9	mbga	mbgb	mbgc1	mbgc3	mbgc8	mbgc9	pcp	tb	max8hroz	maxtimeoz	aqioz	obsoz1	obspercoz1	meanoz1	max8hroz1	maxtimeoz1	aqioz1	obsoz2	obspercoz2	meanoz2
1	54	1	27	0	0	12	62.1503	32.0936	18.9568	15.481	22.886	50.872	210.584	1	144.337	371.626	85.0146	95.0003	Past	1	1	1.91389	16.1787	6.66796	1.86313	1.72998	1.42746	1	3.92472	122.171	1	73.9023	197.369	93.1301	247.557	0	0	0.031	11	26	24	100	0.017417	0.026	12	22	24	100	0.021667
2	34	1	201	0	0	10	11.5691	2.0505	6.68199	1	1.09807	3.21518	2.55236	1	21.95	42.589	24.4099	1	Current	1	1	10.5525	19.6535	1	1.00568	5.71544	1	1	1	1	1	1	16.2549	32.0024	1	0	0	0.014	9	12	24	100	0.014667	0.02	18	17	24	100	0.015625
3	59		25	0	0	7	80.2241	28.1919	1	1	2.50864	11.4161	2.84071	1	183.249	367.721	63.6594	99.3146	Past	1	1	4.12179	31.5205	25.7845	8.19423	1	1	1	1	1.00496	1	109.142	191.58	69.9398	258.081	1	0	0.048	0	41	24	100	0.043125	0.052	20	44	24	100	0.041958
4	39	1	358	0	0	28	11.1688	6.3674	7.90892	1	8.04067	9.68202	100.02	1	1	3.80927	1	1	Current	0	1	4.14592	1	1	1	1	1	1	1	12.548	1	1	1	1	1	0	0	0.034	9	29	24	100	0.033125	0.038	8	32	24	100	0.031042
5	69	1	500	0	0	7	147.487	32.4333	10.4876	13.5638	65.3069	68.281	98.771	1.81113	40.3388	166.286	22.2776	129.676	Past	1	1	1	4.07612	1	1	1	1	1	1	1	1	1	1	1	1	0	0	0.029	9	25	24	100	0.024875	0.031	8	26	24	100	0.007458
6	48	1	111	0	0	7	1.36373	1	1.25245	1	1.43648	11.1045	227.281	14.9396	5.73146	27.1982	15.055	1	Current	1	5.34479	29.7238	31.7855	1	1	1	1	1	1	16.3641	1	1	1	1	1	0	0	0.038	22	32	24	100	0.021625	0.028	8	24	19	79	0.011263
7	52	1	106	1	0	10	46.2954	28.4076	65.4374	4.94376	21.6616	18.8042	148.755	1	62.1422	47.9985	13.9882	1	Current	1	1	3.51854	1	1	1	1	1	1	1	1	1	1	1	1	1	0	0	0.021	11	18	24	100	0.012375	0.017	14	14	24	100	0.009792
8	45	1	300	0	0	105	16.5562	3.70608	5.26841	3.13548	2.75486	14.0173	164.653	9.60842	95.4816	241.836	76.8109	1.32207	Never	1	1.00128	2.14312	1	1	1	1	1	1	1	1	1	1	1	1	1	0	0	0.027	0	23	24	100	0.024208	0.031	21	26	24	100	0.025458
9	46	1	97	1	1	8													Current	1	173.815	20.6268	41.3557	8.92846	1	1	1	1	1	21.6741	1	1	1	1	1	0	0	0.016	7	14	24	100	0.005708	0.009	22	8	24	100	0.005333
10	58	0	30	0	1	6	17.9247	12.2185	6.38006	3.35052	6.92675	13.5793	3.40615	1	120.508	269.262	72.7971	75.1939	Current	1	5.41413	2.37236	1.95595	10.1189	1	1	1	1	1	6.37098	1	1	1	1	1	1	0	0.012	7	10	24	100	0.017208	0.021	0	18	24	100	0.023875
11	30	0	8	0	0	64	44.0796	19.6848	49.1387	5.67702	9.42667	40.4853	1.56567	1	50.6498	164.098	1	47.7479	Never	1	1	5.34036	22.5687	1	1	1	1	1	1	1	1	1	1	1	1	1	0	0.05	11	42	24	100	0.016	0.038	10	32	24	100	0.018708
12	55	1	213	0	0	10	1	1.92597	2.3335	1	3.31299	4.50223	21.0314	1	16.8256	19.1516	2.92011	89.3208	Never	1	1.92744	3.82017	13.6463	1	1	1	1	1	1.55918	9.96365	1	1	1	1	1	0	1	0.038	10	32	24	100	0.032833	0.036	11	31	24	100	0.026958
13	55	1	79	1	0	13	1	3.28498	2.76575	1	1	1	3.8501	1	25.1734	1	1	103.648	Never	1	1.57084	5.19558	6.40241	1	1	1	1	1	1	12.6911	1	1	1	1	1	0		0.034	10	29	24	100	0.026667	0.032	17	27	24	100	0.030542
14	34	1	28	1		11	34.8902	9.6896	26.33	1	3.15491	9.83105	38.8617	1	1	52.8981	1	15.7948	Current	1	1	4.68885	10.3483	1	1	1	1	1	1	6.78161	1	1	1	1	1	0		0.033	11	28	24	100	0.029917	0.038	10	32	24	100	0.036583
15	49		145	1	1	7	4.79576	7.98952	7.82673	1	1	1	16.2583	1.40807	30.8862	12.7715	21.5791	113.453	Never	1	100.461	86.6588	202.282	1	1	1	1	1	1	4.4273	1	1	1	1.66023	1	0	0	0.025	9	21	24	100	0.016875	0.026	8	22	24	100	0.01725
16	55		13		0	7													Past	1	22.283	4.19418	5.81348	1	1	1	1	1	2.89208	48.8606	1	1	1	1	1	0	0	0.035	22	30	24	100	0.027	0.031	9	26	24	100	0.022208
17	41	1	207	0	0	6	6.55725	21.0869	36.6855	3.89829	7.1265	26.102	136.89	22.8299	29.0244	76.7129	13.1233	26.9877	Current	1	1	3.71158	1.21978	1	1	1	1	1	1	1	1	1	1	1	1	1	0	0.024	7	20	24	100	0.019375	0.027	8	23	24	100	0.024542
18	47	1	45	0	0	49	8.02014	3.91511	6.06465	1	5.39921	19.8248	140.758	9.7203	48.0788	245.753	60.8233	142.961	Current	0	10.6045	118.607	29.312	1	1	1	1	1	1	1	1	1	1	1	1	0		0.01	20	8	24	100	0.00825	0.02	10	17	24	100	0.011458
19	55		64		0	34	128.45	4.24306	14.4148	5.23232	14.3153	22.3493	1	1	22.2996	1	1.97897	98.7157	Never	1	1	1.98628	14.0291	1	1	1	1	1	1	1	1	1	1	16.3794	1	0	0	0.004	9	3	24	100	0.002292	0.003	5	3	24	100	0.002958
20	55	0	2	1	0	21	17.2088	8.24925	22.5416	2.11915	4.92215	12.3916	204.25	1	77.6523	365.921	1	193.718	Past	1	14.4924	86.5985	44.3298	1.12051	1	5.00539	1	1	4.6937	195.459	1	67.3621	184.891	105.408	124.595	0		0.019	12	16	24	100	0.0185	0.027	8	23	24	100	0.023958
21	39	1	3	0	0	5	14.3925	17.1746	7.14859	4.29881	7.82682	11.8723	447.327	42.3221	40.7641	825.981	149.477	130.406	Current	1	1	4.00114	10.79	1	2.1081	1	1	1	1	292.738	22.784	30.1962	110.528	60.8876	119.702	0		0.032	10	27	24	100	0.020042	0.046	12	39	24	100	0.013542
22	50	1	504	0	0	7	57.5706	21.9994	21.7137	6.18361	7.01135	22.5344	37.2164	1	24.4763	49.7842	1	102.452	Past	1	1	1.41922	2.83935	1	2.6643	1	2.95469	1	1.31018	12.1144	1	1	1	1	1	1		0.035	12	30	24	100	0.038083	0.042	7	36	24	100	0.038958
23	46	1	14	0	0	9	34.1738	6.62356	21.191	1	2.25665	10.4001	46.2287	1	81.6364	74.3916	23.4523	1	Current	1	79.0408	5.31623	1	1	1.09736	3.38784	1	1	1	1	1	1	1	1	1	0	0	0.021	11	18	24	100	0.012375	0.017	14	14	24	100	0.009792
24	47	0	75	0	0	33	15.0759	14.3541	31.5747	5.85966	4.90805	17.2462	29.2251	1	1	7.72677	1	1	Current	1	1	1.53987	1	1	1	1	1	1	1	1	1	1	1	1	1	1	0	0.02	5	17	24	100	0.011	0.019	21	16	24	100	0.019917
25	38	0	279	0	0	22	13.3524	6.00085	14.1833	1.14466	6.04313	9.42913	230.208	1	1	415.051	1	39.9102	Current	1	1	4.90602	4.2528	1	1	1	1	1	1	59.7569	1	1	1	1	3.01794	1		0.025	10	21	24	100	0.005625	0.01	8	8	19	79	0.006
26	63	0	77	0		50	26.2572	15.0147	9.45974	3.07658	3.20372	27.0594	124.417	1	102.824	198.96	43.9085	53.9884	Current	1	5.29031	2.17932	6.01961	1	1	1	1	1	1	1	1	1	1	1	1	1	0	0.025	0	21	24	100	0.026625	0.028	0	24	24	100	0.026667
27	48	0	27	0	0	3	118.364	41.2748	55.6807	6.08937	11.5893	25.9304	4.51161	90.0576	1.26377	1.20806	279.284	39.4669		1	5.15164	4.13386	9.90658	16.0186	1	1	1	1	7.90145	10.3911	47.8383	1	1	1	1	1		0.028	12	24	24	100	0.026875	0.036	9	31	24	100	0.041333
28	40	1	11	1	0	6	61.665	3.55846	42.7633	3.49153	2.61674	13.0419	209.82	1	42.135	376.463	1	132.759	Past	1	1	24.2584	44.4771	1	1	4.73849	1	1	1	17.8204	1	1	1	1	1	1	0	0.006	8	5	24	100	0.004708	0.01	8	8	24	100	0.007458
29	54	0	77	0	0	12	42.7265	14.5239	31.6378	8.49249	12.3319	14.5593	204.481	1	159.448	335.039	77.9353	89.2133	Past	1	2.63072	33.4519	206.876	8.12032	1	1.23591	1	1	1	116.57	1	95.4597	223.905	107.528	260.906	1	0	0.03	9	25	24	100	0.020583	0.036	20	31	24	100	0.011292
30	46	1	20	0	0	15	2.83279	3.41139	21.1635	1	1.88415	1	140.49	1	6.14738	245.246	15.7569	66.3918	Never	1	1	2.20345	8.43424	1	1	1	1	1	1.27356	1	1	1	1	1	1	1		0.031	9	26	24	100	0.008958	0.02	11	17	24	100	0.014792
31	45	0	305	0	0	7	15.4033	6.92173	16.6889	1	2.59089	10.3459	131.541	3.23583	23.4627	228.308	43.1902	100.712		1	1	12.0606	19.7124	3.32519	1	1	1	1	1	1	1	1	1	1	1	0		0.017	10	14	24	100	0.010667	0.018	9	15	24	100	0.026375
32	36	0	2	0	0	10	23.929	7.36511	33.5117	1.19767	5.42976	18.2939	198.025	1	85.1612	354.139	16.5051	206.605	Current	1	1.17958	6.36589	20.1541	1	1	1	1	1	1	1	1	1	1	1	1	1	0	0.028	9	24	24	100	0.018542	0.021	10	18	24	100	0.014208
33	34	0	100	0	0	7	19.7092	11.3153	33.3368	10.5893	9.67631	31.1102	41.2502	1	1.04118	9.49382	1	1	Past	1	1	2.09486	5.5779	1	1	1	1	1	1	1	1	1	1	1	1	1	0	0.025	11	21	24	100	0.019	0.025	8	21	24	100	0.015875
34	51	0	29	0	0	5	90.3625	30.3791	22.9992	10.4244	14.3858	32.1308	296.163	35.8817	10.4391	539.88	131.964	78.3596	Past	0	25.111	33.1986	70.0958	1	1	1	1	1	1	20.8667	1	1	1	1	1	1		0.039	21	33	24	100	0.019125	0.029	11	25	24	100	0.015375
35	46	0	129	0	0	7	152.676	14.6875	6.17903	2.70262	51.4321	13.9135	11.085	1	45.2748	10.107	1	138.148	Current	1	1	1	1	1	1	1	1	1	1	1	1	1	4.63925	1	15.4356	0		0.014	9	12	24	100	0.005	0.011	8	9	24	100	0.005958
36	60	0	52	0		1	83.0819	31.3341	23.8244	5.83316	31.3086	16.1895	5.33935	3.9694	11.666	2.77468	28.7954	78.8828	Current	1	4.04719	7.86196	51.7799	1	1	1	1	3.14813	2.21099	1	1	1	1	1	1	1		0.031	21	26	24	100	0.021917	0.03	10	25	24	100	0.023292
37	54	0	109	0	0	6	158.717	54.7135	22.4976	8.1656	10.198	38.6699	33.5706	1	33.244	120.897	21.0366	34.9757	Never	1	1.05081	23.1243	7.96309	12.074	1	1	1	1	1.05385	1	1	25.8677	65.2298	24.823	96.9604	1	0	0.043	9	36	24	100	0.035292	0.043	20	36	22	92	0.037136
38	45	0	398	0	0	4	132.528	51.4994	18.5121	3.56845	8.04067	17.0882	175.304	44.3802	7.97448	37.1128	30.6623	1	Never	1	46.8434	9.98541	12.8218	18.3923	1	1	1	1	1	76.6968	1	1	1	17.5169	1	0	0	0.034	9	29	24	100	0.00625	0.014	9	12	24	100	0.014667
39	42	0	26	0	0	4	45.2278	23.6835	34.0066	3.20327	9.63871	5.84346	2.46901	1	23.9335	8.87724	1.66195	1	Past	1	2.64062	10.0578	1	1	1	1	1	1	1	1	1	1	1	1	1	1	0	0.028	7	24	15	63	0.031067	0.034	10	29	24	100	0.028208
40	39	0	51	1	1	3	9.89953	8.44092	29.1153	3.1502	8.18873	16.1353	4.94927	1	15.5019	1	1	1	Never	1	26.5621	4.89396	7.63918	1	1	1	1	1	1	1	1	1	1	1	1	0	0	0.039	11	33	24	100	0.034917	0.038	9	32	24	100	0.030083
41	43	0	15	0	0	6	1	1.08104	1.29911	1	3.11965	10.5717	186.482	26.4742	1	26.9898	12.2295	1	Never	1	1	3.31343	9.02318	1	1	1	1	1	1	1	1	1	1	1	1	1	0	0.016	9	14	24	100	0.016958	0.033	0	28	24	100	0.021958
42	54	1	15	0	0	9	5.29383	2.95241	86.9733	1	1.42708	3.36421	133.166	17.989	91.3497	231.384	83.3084	217.227	Never	1	3.28943	55.9171	112.646	1	1.06392	31.2487	4.20651	3.13751	9.02929	90.5935	12.6505	55.9793	129.314	85.1117	89.4149	0	0	0.028	8	24	24	100	0.014708	0.025	23	21	24	100	0.012083
43	42	1	39	0	0	24	11.8857	13.564	38.0606	2.23107	9.00185	23.4195	99.4811	1.30212	64.6915	43.6267	12.5549	1	Past	1	1	1.12966	4.13501	1	1	1	1	1	1	1	1	1	1	1	1	0	0	0.037	9	31	24	100	0.029042	0.037	10	31	24	100	0.030333
44	48	0	39	0	0	6	208.928	101.926	13.0422	5.81838	6.8821	18.1585	407.619	97.5556	91.4546	750.828	299.674	217.406	Never	1	58.2395	7.18632	18.6523	1	1	1	1	1	2.53323	190.886	42.8102	1	1	2.46692	10.7298	1		0.033	21	28	24	100	0.019875	0.03	11	25	24	100	0.011917
45	38	1	220	0	0	14	81.8688	25.0344	80.3966	2.03699	10.6798	15.2005	110.661	4.23202	54.0158	105.682	33.874	1	Current	1	1	3.8443	17.7394	1	1	1	1	1	1	1	1	1	1	1	1	0	0	0.016	10	14	24	100	0.012083	0.019	11	16	24	100	0.024417
46	32	0	65	0	0	6	10.8584	22.3457	47.2761	1.81612	5.12425	13.2496	35.8323	1	13.3188	47.1646	10.7912	83.302	Current	1	1	7.5724	32.8456	1	1	1	1	1	1	1	1	1	1	1	1	1	0	0.021	12	18	24	100	0.00975	0.017	10	14	24	100	0.012
47	66	0	5	0	0	26	61.7822	8.05511	71.7928	1	2.63501	5.41631	20.336	1	35.327	17.8353	1	121.075	Current	1	1.83334	3.60299	11.2317	1	1	1	3.44916	1	1	1	1	1	1	1	1	1	0	0.015	9	13	24	100	0.010875	0.02	9	17	24	100	0.016667
48	40	0	29	0	0	5	29.7795	19.8763	5.29311	1	1.83129	11.5697	271.243	75.1305	140.903	259.748	31.0094	69.4513	Never	1	1	1	1	1	1	1	1	1	1	43.6673	2.26636	1	8.78316	1	12.6912	1	0	0.034	11	29	24	100	0.02875	0.032	7	27	24	100	0.034667
49	35	0	16	0	0	5	166.177	130.641	21.1087	12.7009	31.9548	83.3146	81.9616	1	11.5155	53.2829	1.92946	48.1465	Never	1	5.31508	6.34176	31.3733	10.5037	7.33139	1	6.10929	5.96608	9.46138	1	1	1	1	1	63.0905	1	0	0.01	9	8	24	100	0.008708	0.019	9	16	24	100	0.015
50	48	0	482	0	0	14	139.049	358.328	86.8617	23.4914	27.2571	56.2415	1	1	1	1	20.4392	29.3589	Never	1	1.23901	5.11113	10.9961	1	2.55411	1	1	1	1	1	1	1	1	1	1	0	0	0.022	20	19	24	100	0.016375	0.023	0	19	24	100	0.022292
51	32	0	8	0	0	1	99.6819	56.0644	48.7764	11.0458	17.6877	36.7326	101.732	5.62582	136.778	310.596	50.1507	93.0401	Never	1	2.81397	5.30417	7.4625	1	3.71824	5.78681	1	1	5.33818	1	1	1	1	1	1	1	0	0.034	9	29	24	100	0.00625	0.014	9	12	24	100	0.014667
52	55	0	214	0	0	3	14.7687	11.5256	50.0829	1	1.38008	1.0268	88.24	1	37.7768	123.452	29.8808	19.8016	Past	1	1	12.7966	1.51425	1	1	1	4.21277	1	1	1	1	1	1	1	1	1	0	0.028	7	24	15	63	0.031067	0.034	10	29	24	100	0.028208
53	55	1	9	1	0	8	17.9559	2.02105	5.83588	1	1.53283	3.95128	275.585	57.631	117.768	500.933	191.107	262.568	Never	1	2.36823	25.2115	74.6011	1	1	1	1	1	1	62.5454	11.15	38.441	68.691	48.4365	60.2804	0	0	0.04	14	34	24	100	0.031167	0.038	18	32	24	100	0.026417
54	23	0	6	0	0	5	27.7157	14.4538	31.4127	12.7245	2.9951	13.4935	59.9501	11.5542	107.841	241.536	21.2745	68.2965	Past	1	1	2.11899	2.72157	1	1	1	1	1	1	1	1	1	1	1	1	1	0	0.02	22	17	24	100	0.014375	0.018	22	15	24	100	0.016083
55	40	0	252	0		14	33.8821	21.5211	20.837	1.20945	6.26403	1	12.9694	1.49156	61.7299	125.823	34.2015	1	Current	1	1	12.5794	60.7906	1	1	3.76663	1	1	1	2.07276	1	29.9085	63.004	50.3629	1	0	0	0.015	9	13	24	100	0.0055	0.015	23	13	24	100	0.001875
56	35	0	114	0	0	4	171.769	94.1157	37.1823	46.6244	10.9336	83.3598	107.735	10.966	38.8755	161.635	1	49.8156	Past	1	3.01208	7.3311	16.6204	1.40472	1	1	1	1	1	1	1	1	10.9382	1	57.0218	1	0	0.025	8	21	24	100	0.018625	0.023	9	19	24	100	0.017792
57	46	0	58	0	0	8	2.21387	2.28078	7.66877	1	1	15.6657	1	1	69.4599	1	1	179.657	Current	1	1	8.63412	36.7031	1	1	1	1	1	1	1	1	1	1.41612	10.148	7.97034	1	0	0.006	7	5	24	100	0.005	0.011	9	9	24	100	0.023667
58	49	1	34	0	1	15	1.11885	7.23918	4.9562	1	1.39418	28.0755	126.66	11.4422	92.4216	219.069	65.5057	219.066	Current	0	3.89365	13.991	53.6939	12.078	8.79296	21.0085	19.6916	25.8934	123.593	201.768	34.9855	90.7879	254.4	148.221	182.064	1		0.029	10	25	24	100	0.013958	0.021	11	18	24	100	0.01575
59	27	0	45	0	0	8	19.4977	17.2717	56.83	4.46078	8.41903	25.4291	1	6.96013	55.4343	1	53.3176	155.585		0	1	6.40209	16.6204	1	1	1	1	1	2.70167	1	1	1	1	1	1	1		0.036	10	31	24	100	0.033125	0.037	9	31	24	100	0.035
60	46	0	54	1	0	8	13.5538	14.8948	118.508	7.14368	9.17105	31.9592	147.272	12.2934	114.737	258.081	67.8205	257.366	Current	0	1	4.44755	15.3837	1	1	1	1	1	3.41206	1	1	30.736	115.073	1	83.1161	1		0.016	23	14	24	100	0.003792	0.006	23	5	24	100	0.002208
61	47	1	7	0	0	36	1	1	1.04997	1	1	4.18611	232.335	42.1265	13.6194	419.077	148.945	79.5227	Current	0	20.8566	27.7693	17.4449	1	1	1	1	1	1	15.0386	1	1	1	1	1	0	0	0.02	10	17	24	100	0.019375	0.022	0	19	24	100	0.023792
62	48	0	15	0	0	6	57.1641	16.5817	34.149	10.9928	17.0484	24.8556	38.9058	1	8.60763	52.9816	3.68003	68.8414	Past	1	1	3.5306	15.7665	1	1	1	1	1	1	1	1	1	1	1	1	1	0	0.019	20	16	24	100	0.00825	0.02	8	17	24	100	0.008208
63	46	1	6	0	0	4	18.2855	183.811	53.5592	8.01835	10.7103	35.6804	1	1	1	1	1	1		1	1	1	6.25518	1	1	1	1	1	1.64707	3.74883	1	1	1	1	1	0		0.029	7	25	24	100	0.027917	0.03	10	25	24	100	0.025667
64	49	1	47	1	0	8	105.38	76.6296	107.513	40.1954	66.919	116.755	84.9397	1	24.4371	90.0158	12.802	5.14775	Past	1	17.3105	194.665	166.976	78.6528	28.5896	89.3992	30.714	47.901	77.8348	125.924	1	70.6471	91.1526	37.9179	109.736	0	0	0.009	9	8	13	54	0.002462	0.004	12	3	24	100	0.007167
65	39	0	38	0	0	13	78.9985	35.0202	61.016	21.9423	25.1514	48.3024	158.779	2.73656	96.1595	279.859	29.2894	225.482	Current	1	3.09132	19.7219	19.3001	1	1	1	1	1	1	6.76804	1	1	1	1	1	1	0	0.034	13	29	24	100	0.006167	0.01	23	8	18	75	0.005278
66	31	0	12	0	0	15	3.85425	4.63633	15.114	1.14466	1	4.62867	34.1856	1	1	1.19621	1	1	Past	1	1	6.54687	4.87118	1	1	1	1	1	1	1	1	1	1	1	1	0	0	0.026	9	22	24	100	0.026958	0.03	8	25	24	100	0.027125
67	30	0	66	0	0	6	4.55039	2.87093	5.56898	1	3.028	7.34728	193.51	26.4092	118.111	345.593	106.205	263.158	Never	1	1.81352	8.70651	23.4815	1	1	1	1	1	1	3.15177	1	1	41.7887	6.40099	25.667	1		0.035	12	30	24	100	0.010875	0.026	11	22	24	100	0.012292
68	43	0	49	0	0	12	21.9221	17.841	65.842	12.5389	52.7293	42.5491	347.289	38.3227	114.109	636.645	138.602	256.289	Never	1	1	1	2.78046	1	1	1	1	1	1	9.08842	1	1	1	1	7.52376	1		0.037	10	31	24	100	0.036375	0.038	8	32	24	100	0.027958
69	42	0	0	0	0	17	1.18994	1.83333	5.74875	1	1.06282	12.6355	63.1603	43.1344	64.324	135.509	15.9704	58.1286	Current	1	1	1	1	1	1	1	1	1	1	1	1	1	1	1	1	1	0	0.036	21	31	24	100	0.029625	0.035	0	30	24	100	0.032875
70	46	0	11	0	0	27	2.28852	1	3.06403	1	1	3.29195	196.977	21.2053	1.22203	67.5818	1	28.201	Past	1	3.74507	6.69165	4.93007	1	1	1	1	1	1	1	1	1	1	1	1	1	0	0.023	7	19	24	100	0.019292	0.021	13	18	24	100	0.018333
71	48	0	52	0	0	22	2.65016	2.80548	5.63622	1	1	6.44409	263.066	72.8293	67.618	212.209	40.5785	34.4159	Never	1	2.63072	9.14086	13.293	1	1	1	1	1	1	54.4759	4.36816	1	1	1	1	1	0	0.033	9	28	19	79	0.014737	0.028	10	24	21	88	0.011048
72	50	0	120	0	1	143	574.474	393.329	103.818	28.8807	33.7409	98.0456	241.03	16.8464	63.7743	435.533	80.2014	169.899	Current	1	9.30694	5.26797	18.9467	226.35	151.851	1	3.32397	2.39986	3.207	3.57243	1	1	1	1	1	1	0	0.038	20	32	24	100	0.029333	0.043	10	36	24	100	0.028875
73	53	0	76	0	0	6	186.529	44.4133	33.8748	12.9512	15.9745	42.2059	157.793	2.67145	165.534	243.986	57.6995	74.5487	Never	1	1	8.34456	38.7939	5.01078	1	1.55431	1.45249	8.36479	7.13979	6.1457	1	83.6367	81.3765	66.9523	173.375	1	0	0.024	0	20	24	100	0.027917	0.032	9	27	24	100	0.0205
74	46	0	267	0	0	5													Current	1	12.338	4.58026	12.7629	1	1	1	1	1	1	22.4285	1	1	14.7526	1	154.649	1	0	0.016	13	14	24	100	0.008792	0.016	8	14	24	100	0.022375
75	38	0	178	0	0	6	583.333	72.2198	40.0426	3.55043	11.0299	22.4622	353.189	51.0691	101.103	647.81	173.263	233.967	Never	1	45.1	7.48794	18.9762	239.007	1	1	1	1	29.7771	89.2773	1	1	19.0085	1	30.6327	1		0.037	9	31	24	100	0.035	0.04	10	34	24	100	0.032917
76	40	0	410	0	0	39	6.20967	1.3318	2.45773	1	1	4.44803	112.702	1	1.32314	32.741	4.31036	1	Never	1	1.3133	5.41275	8.3459	1	1	1	1	1	1	1	1	1	1	1	1	1	0	0.017	8	14	24	100	0.013875	0.016	19	14	24	100	0.015458
77	45		10	1	0	5	2.64968	2.11812	1	1	1.06282	4.0145	429.778	103.023	104.092	792.768	314.542	239.096	Current	1	1	1	5.66624	1	1	1	1	1	1	7.87395	1	1	1	1	1	1	0	0.026	7	22	24	100	0.022583	0.026	1	22	24	100	0.018583
78	44	0	220	0	0	15	89.8351	64.2263	70.7211	28.1209	54.3133	73.6821	1	1	37.4832	34.979	17.8249	1	Current	0	1	11.4332	13.293	1	1	1	1	1	1	1	1	1	1	10.8763	1	1	0	0.032	7	27	24	100	0.034208	0.038	9	32	24	100	0.031708
79	36	0	21	0	0	14	76.8973	39.6111	60.5846	11.5612	46.8213	39.0854	24.2826	1	10.5821	25.4645	20.5104	1	Current	1	1	1	1.0431	1	1	1	1	1	1	1	1	1	1	1	1	1	0	0.017	7	14	24	100	0.012625	0.024	7	20	24	100	0.019375
80	48	1	274	1	0	11	25.1803	20.3778	8.1587	1.91036	29.4191	11.5832	15.0284	21.1837	154.954	334.693	69.6935	83.6588	Current	1	8.97511	11.216	63.8825	1	1	1	1	1	1	1	1	55.1878	132.79	57.7879	185.084	0	0	0.042	11	36	24	100	0.034083	0.038	11	32	24	100	0.035042
81	46	1	4	0	0	5	1.15914	9.07258	1.7145	7.13185	1	5.99701	112.15	1	58.0344	191.608	11.554	160.047	Current	0	45.2437	219.013	25.3956	2.84177	1	1	1	1	1	2.89395	1	1	1	1	1	0		0.027	8	23	24	100	0.031917	0.043	0	36	24	100	0.039208
[truncated: 204 more columns]
