# Supplementary material
Source: publisher figshare collection journal article supplement (https://plos.figshare.com/articles/dataset/_/5190568)
Supplement: Supplementary file 1 [file 1 › S1 Fig.pdf]

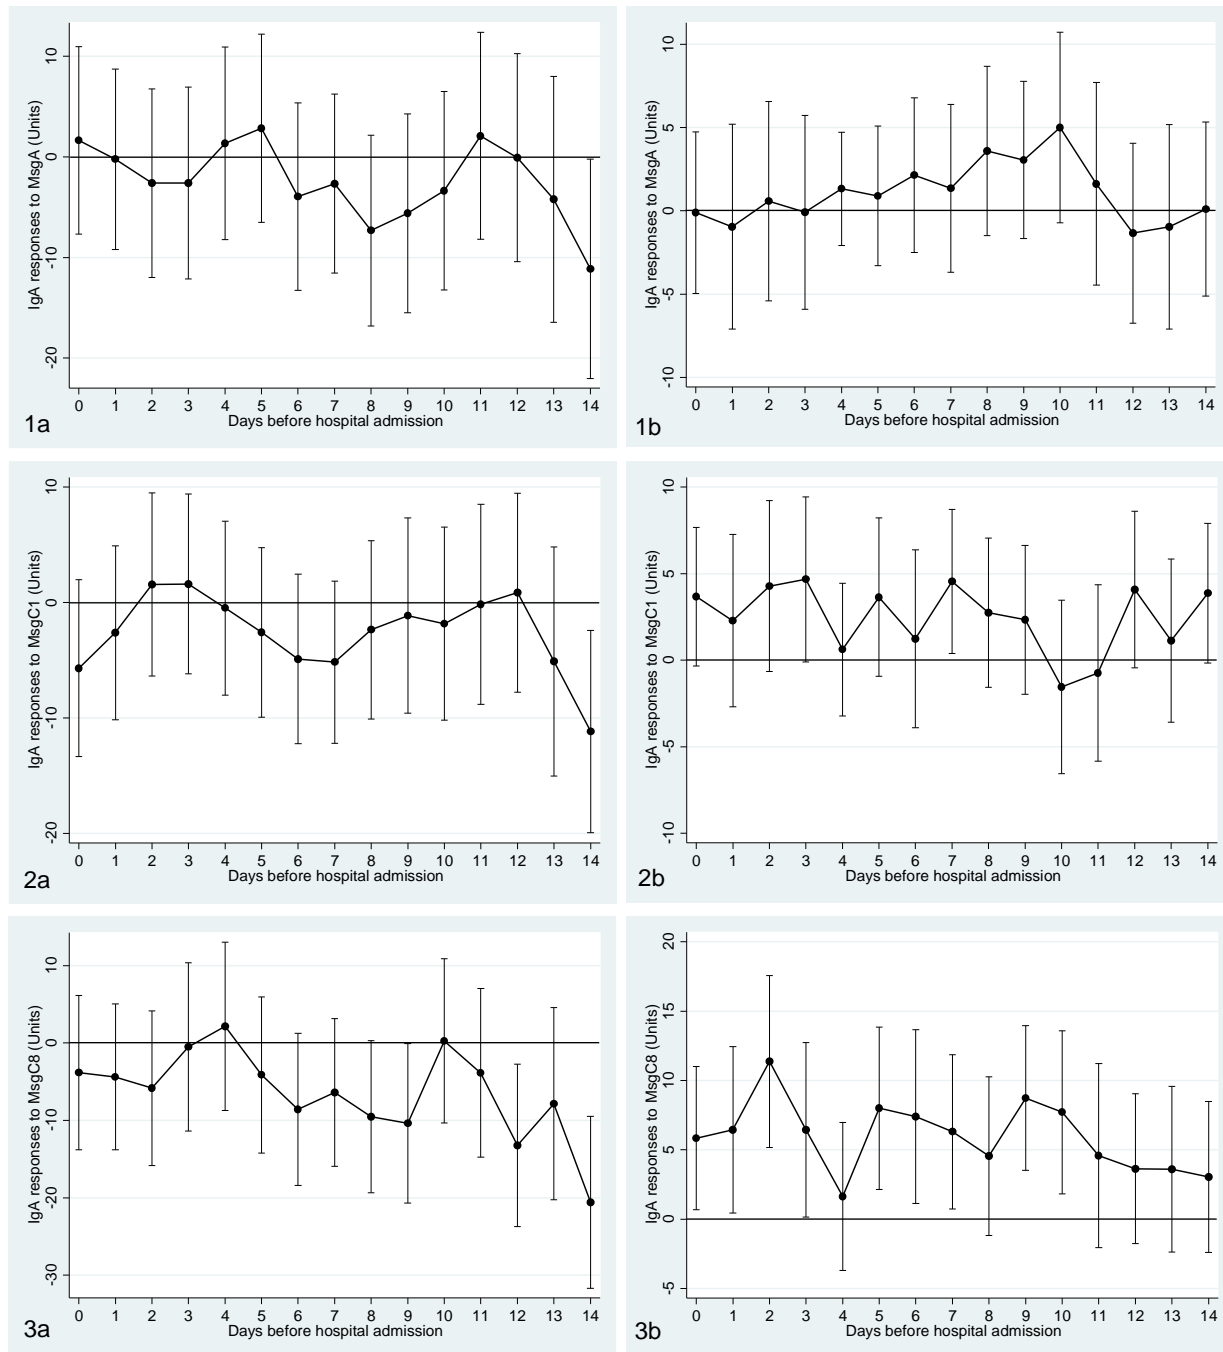

**S1 Fig. Bronchoalveolar IgA responses to (1) MsgA, (2) MsgC1, and (3) MsgC8 for every 10 ppb/m<sup>3</sup> increase in (a) daily 8hr-maximum ozone and (b) daily 1hr-maximum nitrogen dioxide.** Points represent regression  $\beta$  coefficient point estimates and bars represent 95% CIs. Multivariable Tobit regression analyses adjusted for potential confounders—age, gender, race, CD4 count, viral load, antiretroviral therapy, PCP prophylaxis, prior PCP, current tobacco smoker, and homelessness—that were significant at a level of  $P < 0.2$  in bivariate analyses were used to calculate regression  $\beta$  coefficients and 95% CIs.
